# Supplementary material for: Genetic identification of potential nodulating bacteria and nodule-associated bacteria (NAB) within root nodules of Inga punctata trees in a Costa Rican Cloud Forest
Source: Research Square preprint supplement (doi:10.21203/rs.3.rs-3767521/v1), 2023-12-20
Supplement: Supplementary file 1 [file 042b0244e49d18496ba651e6.docx]

**Table 1.** The MPS (Mean %) and standard deviation (StDev) of the primary nodular bacteria (NOD) and nodule-associated bacteria (NAB) with MPS values > 0.1% in the root nodules from 1 year-old (IP1yr), 2 year-old IP2yr), 13 year-old (IP13yr), and old growth (IPOG) *Inga punctata*.

| Genera in IP1yr | NOD/NAB | MPS | StDev |  | Genera in IP13yr | NOD/NAB | MPS | StDev |
| --- | --- | --- | --- | --- | --- | --- | --- | --- |
| *Bradyrhizobium diazoefficiens* | NOD | 85.71 | 9.82 |  | *Bradyrhizobium diazoefficiens* | NOD | 68.22 | 4.89 |
| *Bacillus* | NAB | 2.02 | 2.29 |  | *Bacillus* | NAB | 2.26 | 2.96 |
| *Stenotrophomonas* | NAB | 1.75 | 3.49 |  | *Streptomyces* | NAB | 1.49 | 2.23 |
| *Pseudomonas* | NAB | 0.83 | 0.93 |  | *Pseudomonas* | NAB | 0.81 | 1.37 |
| *Mycobacterium* | NAB | 0.67 | 1.25 |  | *Rhizobium* | NAB | 0.59 | 0.74 |
| *Paenibacillus* | NAB | 0.51 | 0.88 |  | *Cupriavidus* | NAB | 0.47 | 0.81 |
| *Erwinia* | NAB | 0.36 | 0.64 |  | *Paenibacillus* | NAB | 0.43 | 0.67 |
| *Streptomyces* | NAB | 0.33 | 0.73 |  | *Mycobacterium* | NAB | 0.37 | 0.44 |
| *Rhizobium* | NAB | 0.28 | 0.3 |  | *Sphingomonas* | NAB | 0.35 | 0.95 |
| *Cupriavidus* | NAB | 0.24 | 0.36 |  | *Herbaspirillum* | NAB | 0.3 | 0.85 |
| *Burkholderia* | NAB | 0.16 | 0.2 |  | *Flavobacterium* | NAB | 0.28 | 0.76 |
| *Mesorhizobium* | NAB | 0.13 | 0.24 |  | *Klebsiella* | NAB | 0.19 | 0.55 |
| *Enterobacter* | NAB | 0.13 | 0.26 |  | *Burkholderia* | NAB | 0.14 | 0.11 |
| Total MPS of NAB |  | 7.41 | 0.63 |  | *Bosea* | NAB | 0.12 | 0.16 |
|  |  |  |  |  | *Citrobacter* | NAB | 0.11 | 0.34 |
|  |  |  |  |  | *Lysinibacillus* | NAB | 0.11 | 0.13 |
|  |  |  |  |  | Total MPS of NAB |  | 8.03 | 0.79 |
|  |  |  |  |  |  |  |  |  |
| Genera in IP2yr | NOD/NAB | MPS | StDev |  | Genera in IPOG | NOD/NAB | MPS | StDev |
| *Bradyrhizobium diazoefficiens* | NOD | 63.16 | 4.63 |  | *Bradyrhizobium diazoefficiens* | NOD | 78.2 | 3.65 |
| *Burkholderia* | NAB | 2.3 | 2.23 |  | *Bacillus* | NAB | 2.51 | 0.06 |
| *Bacillus* | NAB | 2 | 0.74 |  | *Kosakonia* | NAB | 2.49 | 1.66 |
| *Flavobacterium* | NAB | 1.39 | 2.49 |  | *Mycobacterium* | NAB | 2.26 | 0.2 |
| *Cupriavidus* | NAB | 1.11 | 2.1 |  | *Pseudomonas* | NAB | 1.11 | 0.64 |
| *Mycobacterium* | NAB | 0.37 | 0.32 |  | *Enterobacter* | NAB | 0.97 | 0.64 |
| *Streptomyces* | NAB | 0.36 | 0.29 |  | *Paenibacillus* | NAB | 0.61 | 0.18 |
| *Paenibacillus* | NAB | 0.29 | 0.31 |  | *Rhizobium* | NAB | 0.43 | 0.29 |
| *Erwinia* | NAB | 0.19 | 0.26 |  | *Stenotrophomonas* | NAB | 0.39 | 0.28 |
| *Staphylococcus* | NAB | 0.18 | 0.2 |  | *Streptomyces* | NAB | 0.31 | 0.1 |
| *Rhizobium* | NAB | 0.16 | 0.15 |  | *Klebsiella* | NAB | 0.21 | 0.15 |
| *Caulobacter* | NAB | 0.1 | 0.21 |  | *Flavobacterium* | NAB | 0.16 | 0.1 |
| Total MPS of NAB |  | 8.45 | 0.8 |  | *Rhodococcus* | NAB | 0.14 | 0.02 |
|  |  |  |  |  | *Bosea* | NAB | 0.13 | 0.05 |
|  |  |  |  |  | *Nocardia* | NAB | 0.13 | 0.2 |
|  |  |  |  |  | *Variovorax* | NAB | 0.12 | 0.17 |
|  |  |  |  |  | *Nitrobacter* | NAB | 0.11 | 0.09 |
|  |  |  |  |  | *Cupriavidus* | NAB | 0.11 | 0 |
|  |  |  |  |  | Total MPS of NAB |  | 12.2 | 0.87 |

**Table 2**. Collective list of NAB genera found within the root nodules of Inga punctata and the plan growth promoting activities that have been associated with the different genera (PO43- Sol = phosphate solubiliazation, IAA = auxin production, Sideroph = siderophore production, CO2/C1 Fix = ability to fix CO2 and other C1 compounds, CCD = complex organic C degraders, N-Fix = nitrogen fixation ability, AMO = ammonium or nitrite oxidation ability, NOD = has been shown to be able to form root nodules)

| | Genus | Protease | Lipase | Cellulase | PO43- Sol | IAA | Sideroph | CO2/C1 Fix | N-Fix | AMO | NOD | | --- | --- | --- | --- | --- | --- | --- | --- | --- | --- | --- | | *Bacillus* | x |  | x |  | x |  | x | x | x |  | | *Bosea* |  |  |  |  |  |  |  | x |  | x | | *Bradyrhizobium* |  |  |  |  | x | x | x | x | x | x | | *Burkholderia* | x | x | x | x | x | x | x | x | x | x | | *Caulobacter* |  |  |  |  |  |  |  | x | x |  | | *Citrobacter* |  |  |  |  |  |  |  |  |  |  | | *Cupriavidus* |  |  |  |  |  | x | x | x |  | x | | *Enterobacter* | x |  | x | x | x | x |  | x |  |  | | *Erwinia* |  |  |  |  |  |  |  | x |  |  | | *Flavobacterium* |  |  |  |  |  |  |  |  |  |  | | *Herbaspirillum* |  |  |  |  | x |  | x | x |  |  | | *Klebsiella* |  |  |  |  |  |  |  | x |  |  | | *Kosakonia* |  |  |  | x | x | x |  |  |  |  | | *Lysinibacillus* |  |  |  |  |  |  |  | x |  |  | | *Mesorhizobium* |  |  | x | x | x |  | x |  |  | x | | *Mycobacterium* |  |  |  |  |  |  | x | x |  |  | | *Nitrobacter* |  |  |  |  |  |  | x |  | x |  | | *Nocardia* |  |  |  |  |  |  | x |  |  |  | | *Paenibacillus* | x | x | x | x | x | x |  | x |  |  | | *Pseudomonas* |  |  |  |  | x |  |  | x | x | x | | *Rhizobium* |  |  | x | x | x | x | x | x |  | x | | *Rhodococcus* |  |  |  |  | x |  |  | x |  | x | | *Sphingomonas* |  |  |  | x | x |  |  | x | x |  | | *Staphylococcus* |  |  |  |  |  |  |  |  |  |  | | *Stenotrophomonas* | |  |  | x | x | x |  | x |  |  | | *Streptomyces* |  |  |  |  |  |  | x | x | x |  | | *Variovorax* | x | x | x | x |  |  | x |  |  |  | |  |  |  |  |  |  |  |  |  |  |
| --- | --- | --- | --- | --- | --- | --- | --- | --- | --- | --- | --- | --- | --- | --- | --- | --- | --- | --- | --- | --- | --- | --- | --- | --- | --- | --- | --- | --- | --- | --- | --- | --- | --- | --- | --- | --- | --- | --- | --- | --- | --- | --- | --- | --- | --- | --- | --- | --- | --- | --- | --- | --- | --- | --- | --- | --- | --- | --- | --- | --- | --- | --- | --- | --- | --- | --- | --- | --- | --- | --- | --- | --- | --- | --- | --- | --- | --- | --- | --- | --- | --- | --- | --- | --- | --- | --- | --- | --- | --- | --- | --- | --- | --- | --- | --- | --- | --- | --- | --- | --- | --- | --- | --- | --- | --- | --- | --- | --- | --- | --- | --- | --- | --- | --- | --- | --- | --- | --- | --- | --- | --- | --- | --- | --- | --- | --- | --- | --- | --- | --- | --- | --- | --- | --- | --- | --- | --- | --- | --- | --- | --- | --- | --- | --- | --- | --- | --- | --- | --- | --- | --- | --- | --- | --- | --- | --- | --- | --- | --- | --- | --- | --- | --- | --- | --- | --- | --- | --- | --- | --- | --- | --- | --- | --- | --- | --- | --- | --- | --- | --- | --- | --- | --- | --- | --- | --- | --- | --- | --- | --- | --- | --- | --- | --- | --- | --- | --- | --- | --- | --- | --- | --- | --- | --- | --- | --- | --- | --- | --- | --- | --- | --- | --- | --- | --- | --- | --- | --- | --- | --- | --- | --- | --- | --- | --- | --- | --- | --- | --- | --- | --- | --- | --- | --- | --- | --- | --- | --- | --- | --- | --- | --- | --- | --- | --- | --- | --- | --- | --- | --- | --- | --- | --- | --- | --- | --- | --- | --- | --- | --- | --- | --- | --- | --- | --- | --- | --- | --- | --- | --- | --- | --- | --- | --- | --- | --- | --- | --- | --- | --- | --- | --- | --- | --- | --- | --- | --- | --- | --- | --- | --- | --- | --- | --- | --- | --- | --- | --- | --- | --- | --- | --- | --- | --- | --- | --- | --- | --- | --- | --- | --- | --- | --- | --- | --- | --- | --- | --- |
|  |  |  |  |  |  |  |  |  |  |  |
|  |  |  |  |  |  |  |  |  |  |  |
|  |  |  |  |  |  |  |  |  |  |  |
|  |  |  |  |  |  |  |  |  |  |  |
|  |  |  |  |  |  |  |  |  |  |  |
|  |  |  |  |  |  |  |  |  |  |  |
|  |  |  |  |  |  |  |  |  |  |  |
| **Table 3.** Differences in the presence and composition of the root nodular bacteria. 3a) Difference in the presence and ranking of all bacterial genera (with MPS values > 0.1%) within the root nodules of 1 year-old (IP1yr), 2 year-old IP2yr), 13 year-old (IP13yr), and old growth (IPOG) *Inga punctata*. The numbers represent the ranking of the MPS values of the taxa within the nodules of different ages of tree. 3b) Differences in the NAB genera organized by number of genera found in nodules of 1, 2, 3, or all 4 tree ages.  3a)   | Genera | IP1yr | IP2yr | IP13 | IPOG | | --- | --- | --- | --- | --- | | *Bacillus* | 1 | 2 | 1 | 1 | | *Bosea* |  |  | 13 | 13 | | *Burkholderia* | 10 | 1 | 12 |  | | *Caulobacter* |  | 11 |  |  | | *Citrobacter* |  |  | 14 |  | | *Cupriavidus* | 9 | 4 | 5 | 17 | | *Enterobacter* | 12 |  |  | 5 | | *Erwinia* | 6 | 8 |  |  | | *Flavobacterium* |  | 3 | 10 | 11 | | *Herbaspirillum* |  |  | 9 |  | | *Klebsiella* |  |  | 11 | 10 | | *Kosakonia* |  |  |  | 2 | | *Lysinibacillus* |  |  | 15 |  | | *Mesorhizobium* | 11 |  |  |  | | *Mycobacterium* | 4 | 5 | 7 | 3 | | *Nitrobacter* |  |  |  | 16 | | *Nocardia* |  |  |  | 14 | | *Paenibacillus* | 5 | 7 | 6 | 6 | | *Pseudomonas* | 3 |  | 3 | 4 | | *Rhizobium* | 8 | 10 | 4 | 7 | | *Rhodococcus* |  |  |  | 12 | | *Sphingomonas* |  |  | 8 |  | | *Staphylococcus* |  | 9 |  |  | | *Stenotrophomonas* | 2 |  |  | 8 | | *Streptomyces* | 7 | 6 | 2 | 9 | | *Variovorax* |  |  |  | 15 |   3b)   | 1 Type of Tree Age Nodule | | 2 Types of Tree Age Nodules | | 3 Types of Tree Age Nodules | | 4 Types of Tree Age Nodules | | | --- | --- | --- | --- | --- | --- | --- | --- | | *Caulibacter* | *Nitrobacter* | *Bosea* |  | *Burkholderia* |  | *Bacillus* |  | | *Citrobacter* | *Nocardia* | *Erwinia* |  | *Flavobacterium* |  | *Cupriavidus* | | | *Herbispirillum* | *Rhodococcus* | *Klebsiella* |  | *Pseudomonas* |  | *Mycobacterium* | | | *Kosakonia* | *Sphinigomonas* | *Stentrophomonas* | |  |  | *Paenibacillus* |  | | *Lysinibacillus* | *Staphylococcus* |  |  |  |  | *Rhizobium* | | | *Mesorhizobium* | *Variovorax* |  |  |  |  | *Streptomyces* |  | |  |  |  |  |  |  |  |  |  |  |
|  |  |  |  |  |  |  |  |  |  |  |
|  |  |  |  |  |  |  |  |  |  |  |
|  |  |  |  |  |  |  |  |  |  |  |
|  |  |  |  |  |  |  |  |  |  |  |
| | **Table 4.** Multivariate-level analysis of the differences in the composition of the nodule-associated bacteria within the root nodules of 1 year-old (IP1yr), 2 year-old IP2yr), 13 year-old (IP13yr), and old growth (IPOG) *Inga punctata* by ANOSIM and Canonical Analysis of Principal Coordinates (CAP) assessment of the communities. The ANOSIM R and *p* values are presented for both the Global and the Pairwise tests, and the Canonical Correlation Squared (R2) values and *p* values for the CAP are also are presented. The CAP R2 values > 0.7 = Strong differences between means, 0.50 to 0.69 = Medium differences, and < 0.49 = Weak differences.   |  | ANOSIM Global Test | | CAP Procedure | | --- | --- | --- | --- | |  | R Statistic | *p* value | Model *p* value | |  | 0.256 | 0.017 | 0.035 | |  |  |  |  | |  | ANOSIM Paired Tests | | CAP Procedure | | Comparisons | R Statistic | *p* value | R2 values | | IP1yr, IP2yr | 0.265 | 0.050 | 0.606 | | IP1yr, IP13yr | 0.392 | 0.032 | 0.748 | | IP1yr, IPOG | 0.444 | 0.028 | 0.748 | | IP2yr, IP13yr | 0.032 | 0.357 | 0.244 | | IP2yr, IPOG | 0.274 | 0.048 | 0.606 | | IP13yr, IPOG | 0.092 | 0.214 | 0.244 | | | --- | --- | --- | --- | --- | --- | --- | --- | --- | --- | --- | --- | --- | --- | --- | --- | --- | --- | --- | --- | --- | --- | --- | --- | --- | --- | --- | --- | --- | --- | --- | --- | --- | --- | --- | --- | --- | --- | --- | --- | --- | --- | --- | --- | --- | --- | --- | --- | --- | |  |  |  |  |  |  |  |  |  |  |
|  |  |  |  |  |  |  |  |  |  |  |

**Table 5.** The results of the analysis to indicate differences in complexity of the NAB communities within the root nodules of 1 year-old (IP1yr), 2 year-old (IP2yr), 13 year-old (IP13yr), and old growth (IPOG) *I. punctata* root nodules. Results are shown for the Similarity Percentage (SIMPER) analyses demonstrating the similarities in the NAB community compositions; the mean levels of Margalef’s Richness (*d*) and Shannon’s Diversity (*H*) indices with the Kruskal–Wallis analysis of these means; and the *S* indices of the MPS levels of the NAB genera and the Richness and Diversity of the NAB communities to show differences in the stability or constancy of the value of these metrics. Kruskal-Wallis differences in means (*p* < 0.05) in mean values of *d* or *H* are represented by different letters. The *S* index for both d and H were also determined.

|  | Indicators of NAB Community Composition Stability and Complexity | | | | | |
| --- | --- | --- | --- | --- | --- | --- |
|  | *S* Index of MPS Values | SIMPER of MPS Values | Mean d | *S* Index of d Values | Mean H | *S* Index of H Values |
| IP1yr | 8.73 | 26.17% | 7.04a ± 1.33 | 5.28 | 2.37a ± 0.38 | 6.22 |
| IP2yr | 13.65 | 53.85% | 7.31a± 1.28 | 5.71 | 2.86a ± 0.35 | 7.94 |
| IP13yr | 13.94 | 50.01% | 7.95a ± 1.26 | 6.31 | 2.85a ± 0.32 | 8.91 |
| IPOG | 21.42 | 79.65% | 9.33b ± 0.38 | 24.7 | 3.50b ± 0.14 | 24.69 |

**Table 6**. The percent of the nodule-associated bacterial genera with the potential for specific plant growth promoting(PGP) activities found within the root nodules of 1 year-old (IP1yr), 2 year-old IP2yr), 13 year-old (IP13yr), and old growth (IPOG) *Inga punctata*. The PGP activities shown are for Protease, Lipase, and Cellulase enzymatic, phosphate solubilization activity (PO4 Sol), auxin production (IAA or Indole-3-acetic acid), Siderophore production (Sideroph), N-Fixation (N-Fix), ammonium oxidation or nitrification (AMO), and CO2/other C1 fixations (CO2/C1 fix).

| Tree Age Nodules | Protease | Lipase | Cellulase | PO4 Sol | IAA | Sideroph | N-fix | AMO | CO2/C1 Fix | Mean % of all Activities |
| --- | --- | --- | --- | --- | --- | --- | --- | --- | --- | --- |
| IP1 yr | 38.46 | 25 | 76.92 | 53.85 | 69.23 | 61.54 | 69.23 | 38.46 | 69.23 | 55.77 ± 17.94 |
| IP2yr | 25 | 16.67 | 58.33 | 25 | 41.67 | 41.67 | 66.67 | 41.67 | 58.33 | 41.67 ± 17.18 |
| IP13yr | 25 | 23.08 | 43.75 | 31.25 | 50 | 37.5 | 68.75 | 43.75 | 50 | 41.45 ± 14.27 |
| IPOG | 22.22 | 16.67 | 38.89 | 27.78 | 44.44 | 50 | 61.11 | 38.89 | 44.44 | 38.27 ± 14.01 |
