# Supplementary material for: Genetic identification of potential nodulating bacteria and nodule-associated bacteria (NAB) within root nodules of Inga punctata trees in a Costa Rican Cloud Forest
Source: Research Square preprint supplement (doi:10.21203/rs.3.rs-3767521/v1), 2023-12-20
Supplement: Supplementary file 2 [file 32f19d6b98453a0a116da703.docx]

**Table S1.** Literature concerning PGP activities associated with specific bacterial genera.

1. Aserse AA, Räsänen LA, Aseffa F, Hailemariam A, Lindström K (2013) Diversity and sporadic symbionts and nonsymbiotic endophytic bacteria isolated from nodules of woody, shrub, and food legumes in Ethiopia. Appl Microbiol Biot 97: 10117–10134
2. De Meyer SE, De Beuf K, Vekeman B, Willems A (2015) A large diversity of non-rhizobial endophytes found in legume root nodules in Flanders (Belgium). Soil Biol. Biochem*.* 2015, *83*, 1–11
3. Etesami H (2022 )Root Nodules of Legumes: A Suitable Ecological Niche for Isolating Non-Rhizobial Bacteria with Biotechnological Potential in Agriculture. Curr. Res. Biotechnol. 4, 78–86.
4. Gupta P, Rani R, Usmani Z, Chandra A, Kumar V. (2019) The role of plant-associated bacteria in phytoremediation of trace metals in contaminated soils. In: New and Future Developments in Microbial Biotechnology and Bioengineering (Editors: Singh JS, D.P. Singh DP, pp. 69-76. Elsevier. https://doi.org/10.1016/B978-0-444-64191-5.00005-5
5. Li JH, Wang ET, Chen WF, Chen WX (2008) Genetic diversity and potential for promotion of plant growth detected in nodule endophytic bacteria of soybean grown in Heilongjiang province of China. Soil Biol Biochem. 2008, 40(1): 238-246. <https://doi.org/10.1016/>
6. Liaqat F, Eltem R (2016) Identification and characterization of endophytic bacteria isolated from in vitro cultures of peach and pear rootstocks. 3 Biotech 6(2):120. doi: 10.1007/s13205-016-0442-6.
7. Martínez-Hidalgo P, Hirsch AM (2017) The Nodule Microbiome: N2 -Fixing Rhizobia Do Not Live Alone. Phytobiomes J. 1, 70–82.
8. Olanrewaju OS, Glick BR, Babalola OO (2017) Mechanisms of action of plant growth promoting bacteria. World J Microbiol Biotechnol. 33(11):197. doi: 10.1007/s11274-017-2364-9.
9. Pang J, Palmer M, Sun HJ, Seymour CO, Zhang L, Hedlund BP and Zeng F (2021) Diversity of Root Nodule-Associated Bacteria of Diverse Legumes Along an Elevation Gradient in the Kunlun Mountains, China. Front. Microbiol. 12:633141. doi: 10.3389/fmicb.2021.633141.
10. Peix A, írez-Bahena MH, Velázquez E, Bedmar EJ (2015) Bacterial Associations with Legumes, Critical Reviews in Plant Sciences, 34:1-3, 17-42, DOI: [10.1080/07352689.2014.897899](https://doi.org/10.1080/07352689.2014.897899)
11. Santoyo G, Moreno-Hagelsieb G, Orozco-Mosqueda M del C, Glick BR. Plant growth-promoting bacterial endophytes (2016). Microbiol Res 183:92-9.
12. Shah A, Nazari M, Antar M, Msimbira LA, Naamala J, Lyu D, Rabileh M, Zajonc J and Smith DL (2021) PGPR in Agriculture: A Sustainable Approach to Increasing Climate Change Resilience. Front. Sustain. Food Syst. 5:667546. doi: 10.3389/fsufs.2021.667546
13. Soares R, Trejo J, Lorite MJ, Figueira E, Sanjuán J, Videira E Castro I (2020) Diversity, Phylogeny and Plant Growth Promotion Traits of Nodule Associated Bacteria Isolated from *Lotus parviflorus*. Microorganisms 8(4):499. doi: 10.3390/microorganisms8040499.
14. Velázquez, E.; Carro, L.; Flores-Félix, J.D.; Martínez-Hidalgo, P.; Menéndez, E.; Ramírez-Bahena, M.H.; Mulas, R.; González-Andrés, F.; Martínez-Molina, E.; Peix, A (2017) The Legume Nodule Microbiome: A Source of Plant growth-Promoting Bacteria. In Probiotics and Plant Health; Kumar, V., Kumar, M., Sharma, S., Prasad, R., Eds.; Springer: Singapore, pp. 41–70.
15. Tapia-García EY, Hernández-Trejo V, Guevara-Luna J, Rojas-Rojas FU, Arroyo-Herrera I, Meza-Radilla G, Vásquez-Murrieta MS, Estrada-de Los Santos P (2020). Plant growth-promoting bacteria isolated from wild legume nodules and nodules of *Phaseolus vulgaris* L. trap plants in central and southern Mexico. Microbiol Res 239:126522. doi: 10.1016/j.micres.2020.
16. Tariq M, Hameed S, Yasmeen T, Zahid M, Zafar M (2014) Molecular characterization and identification of plant growth promoting endophytic bacteria isolated from the root nodules of pea (*Pisum sativum* L.). World J Microbiol Biotechnol 30(2):719-25. doi: 10.1007/s11274-013-1488-9.
