# Supplementary material for: Genetic identification of potential nodulating bacteria and nodule-associated bacteria (NAB) within root nodules of Inga punctata trees in a Costa Rican Cloud Forest
Source: Research Square preprint supplement (doi:10.21203/rs.3.rs-3767521/v1), 2023-12-20
Supplement: Supplementary file 3 [file b71b7b37c063ce8650041e32.docx]

**Table S2.** References for the placement of bacterial genera into the 2 functional groups N-Fixers or Ammonium Oxidizers.

1. Berthrong ST, Yeager CM, Gallegos-Graves LV, Steven B, Eichorst SA, Jackson RB, Kuske CR. (2014). Nitrogen fertilization has a stronger effect on soil nitrogen-fixing bacterial communities than elevated atmospheric CO2. Appl Environ Microbiol 80:3103–3112.
2. Hsu SF, Buckley DH. (2009). Evidence for the functional significance of diazotroph community structure in soil. ISME J 3:124–136.
3. Huang XF, Santhanam N, Badri DV et al., (2013). Isolation and characterization of lignin-degrading bacteria from rainforest soils. Biotechnol Bioeng110:1616–26.
4. Isobe K, Koba K, Otsuka S, Senoo K (2011). Nitrification and nitrifying microbial communities in forest soils. J For Res. 16: 351–362.
5. Laverman AM, Speksnijder AG, Braster M, Kowalchuk GA, Verhoef HA, Van Verseveld HW. (2001). Spatiotemporal stability of an ammonia-oxidizing community in a nitrogen-saturated forest soil. Microb Ecol 42:35–45.
6. Lladó S, López-Mondéjar R, Baldrian P. (2017). Forest soil bacteria: diversity, involvement in ecosystem processes, and response to global change. Microbiol Mol Biol Rev 81:e00063-16. <https://doi.org/10.1128/MMBR.00063-16>.
7. Long X, Chen C, Xu Z, Oren R, He J-Z (2012). Abundance and community structure of ammonia-oxidizing bacteria and archaea in a temperate forest ecosystem under ten-years elevated CO2. Soil Biol Biochem 46:163–171.
8. Pajares S, Bohannan BJM*.* (2016). Ecology of nitrogen fixing, nitrifying, and denitrifying microorganisms in tropical forest soils. Front Microbiol. 7:1045. doi:10.3389/fmicb.2016.01045
9. Reed SC, Cleveland CC, Townsend AR. (2011). Functional ecology of free-living nitrogen fixation: a contemporary perspective. Annu Rev Ecol Evol Syst 42:489 –51.
10. Tian JH, Pourcher AM, Bouchez T *et al.,* (2014). Occurrence of lignin degradation genotypes and phenotypes among prokaryotes. Appl Microbiol Biotechnol. (98): 9527–44.
